# Supplementary material for: Intriguing structural chemistry of neutral and anionic layered monoalkylphosphates: single-source precursors for high-yield ceramic phosphates
Source: Royal Society of Chemistry journal article supplement (doi:10.1039/c7ce01066d), 2017-01-01
Supplement: c7ce01066d1.pdf [file c7ce01066d1.pdf]

**Supporting Information for**  
**Intriguing Structural Chemistry of Neutral and Anionic Layered**  
**Monoalkylphosphates: Single-Source Precursors for High-Yield Ceramic**  
**Phosphates**

Gulzar A. Bhat, Alok Ch. Kalita and Ramaswamy Murugavel\*

---

**Figure S1.** FT-IR spectra of compounds **1-4**.

**Figure S2.**  $^1\text{H}$  NMR spectrum of compound **1** ( $\text{D}_2\text{O}$  500 MHz).

**Figure S3.**  $^1\text{H}$  NMR spectrum of compound **2** ( $\text{D}_2\text{O}$  500 MHz).

**Figure S4.**  $^1\text{H}$  NMR spectrum of compound **3** ( $\text{D}_2\text{O}$  500 MHz).

**Figure S5.**  $^1\text{H}$  NMR spectrum of compound **4** ( $\text{D}_2\text{O}$  500 MHz).

**Figure S6:**  $^{13}\text{C}$  NMR spectrum of compound **1** ( $\text{D}_2\text{O}$ ).

**Figure S7:**  $^{13}\text{C}$  NMR spectrum of compound **2** ( $\text{D}_2\text{O}$ ).

**Figure S8:**  $^{13}\text{C}$  NMR spectrum of compound **3** ( $\text{DMSO-d}_6$ ).

**Figure S9:**  $^{13}\text{C}$  NMR spectrum of compound **4** ( $\text{D}_2\text{O}$ ).

**Figure S10:**  $^{31}\text{P}$  NMR spectra of compounds **1-4** in ( $\text{D}_2\text{O}$ ).

**Figure S11.** FT-IR spectra of compounds **5-7**(in KBr diluted discs).

**Figure S12.**  $^1\text{H}$  NMR spectrum of compound **5** ( $\text{D}_2\text{O}$  500 MHz).

**Figure S13.**  $^1\text{H}$  NMR spectrum of compound **6** ( $\text{D}_2\text{O}$  500 MHz).

**Figure S14.**  $^1\text{H}$  NMR spectrum of compound **7** ( $\text{DMSO-d}_6$  500 MHz).

**Figure S15.**  $^1\text{H}$  NMR spectrum of compound **8** ( $\text{DMSO-d}_6$  500 MHz).

**Figure S16:**  $^{13}\text{C}$  NMR spectrum of compound **5** ( $\text{DMSO-d}_6$ ).

**Figure S17:**  $^{13}\text{C}$  NMR spectrum of compound **6** ( $\text{CD}_3\text{CN-d}_3$ ).

**Figure S18:**  $^{13}\text{C}$  NMR spectrum of compound **7** ( $\text{CD}_3\text{CN-d}_3$ ).

**Figure S19:** ESI-MS spectrum of compound **5** (reported in  $\text{CH}_3\text{CN}$ ).

**Figure S20:** ESI-MS spectrum of compound **7** (reported in  $\text{CH}_3\text{CN}$ ).

**Figure S21:** Molecular structure of **1** showing immediate hydrogen bonding between hydrogen atoms of quaternised cyclohexyl amine and the oxygen and hydrogen atoms of phosphate ligand.

**Figure S22:** Molecular structure of **3** showing immediate hydrogen bonding between hydrogen atoms of quaternised cyclohexyl amine and the oxygen and hydrogen atoms of isopropyl phosphate ligand.

**Figure S23:** Molecular structure of **4** showing immediate hydrogen bonding between hydrogen atoms of quaternised cyclohexyl amine and the oxygen and hydrogen atoms of tertiary butyl phosphate ligand.

**Figure S24:** Hydrogen bonding interactions in **1** (a) represents the sheet formation due to extensive hydrogen bonding between the hydrogen atoms of cyclohexyl ammonium and  $\text{-OPO}_3\text{H}$  units, lattice  $\text{H}_2\text{O}$  molecules and  $\text{OPO}_3\text{H}$  units of methyl phosphate; (b) represents the layered structure of **1**.

**Figure S25:** Hydrogen bonding interactions in **3** (a) represents the sheet formation due to extensive hydrogen bonding between the hydrogen atoms of cyclohexyl ammonium and  $\text{-OPO}_3\text{H}$  units of isopropyl phosphate; (b) represents the layered structure of **3**.

**Figure S26:** Hydrogen bonding interactions in **4** (a) represents the sheet formation due to extensive hydrogen bonding between the hydrogen atoms of cyclohexyl ammonium and  $\text{-OPO}_3\text{H}$  units of tertiary butyl phosphate; (b) represents one dimensional chain formation in **4**.

**Figure S27:** Hydrogen bonding interactions in **9** (a) represents the sheet formation due to extensive hydrogen bonding between the hydrogen atoms of cyclohexyl ammonium and  $\text{-OPO}_3\text{H}$  units of tertiary butyl phosphate and  $\text{OPO}_3\text{H}_2$  units of free isopropyl phosphate.

**Figure S28.** FT-IR spectrum of compound **3**.

**Figure S29.** DSC trace of compound **3**.

**Figure S30.** SEM characterisation of compound **10** with EDX and element mapping.

**Table S1:** Hydrogen bond table for **1** [ $\text{\AA}$  and  $^\circ$ ].

**Table S2:** Hydrogen bond table for **2** [ $\text{\AA}$  and  $^\circ$ ].

**Table S3:** Hydrogen bond table for **3** [ $\text{\AA}$  and  $^\circ$ ].

**Table S4:** Hydrogen bond table for **4** [ $\text{\AA}$  and  $^\circ$ ].

**Table S5:** Hydrogen bond table for **7** [ $\text{\AA}$  and  $^\circ$ ].

**Table S6:** Hydrogen bond table for **9** [ $\text{\AA}$  and  $^\circ$ ].

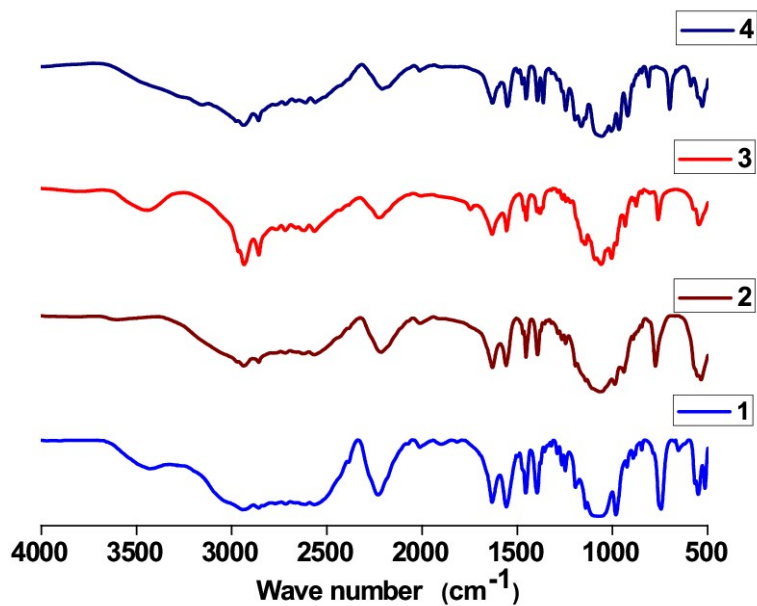

**Figure S1.** FT-IR spectra of compounds **1-4** (as KBr diluted discs).

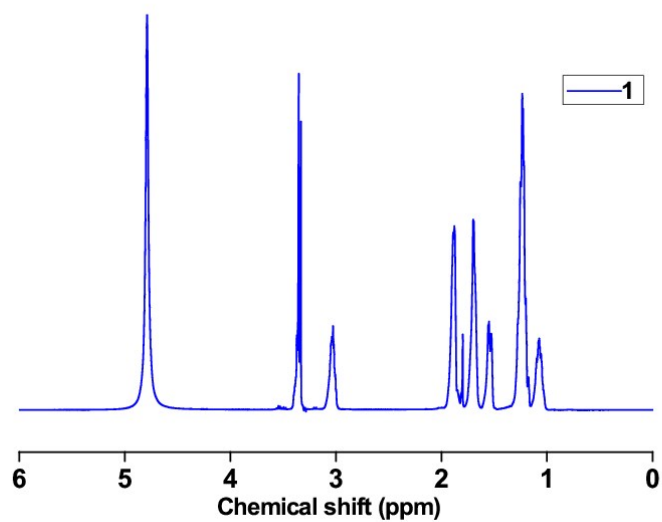

**Figure S2.**  $^1\text{H}$  NMR spectrum of compound **1** ( $\text{D}_2\text{O}$  500 MHz).

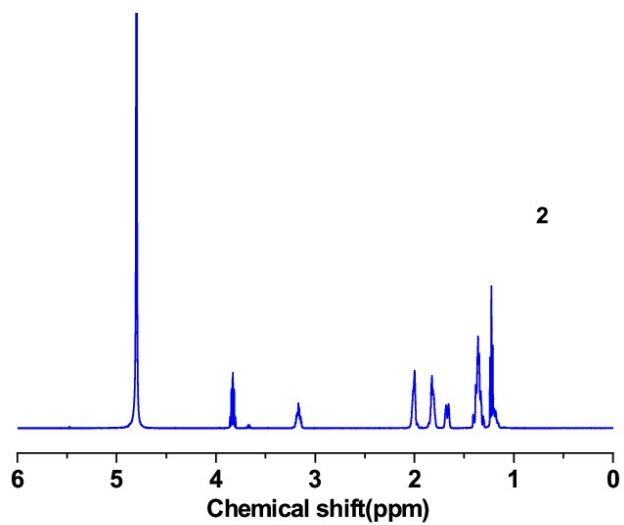

**Figure S3.**  $^1\text{H}$  NMR spectrum of compound **2** ( $\text{D}_2\text{O}$  500 MHz).

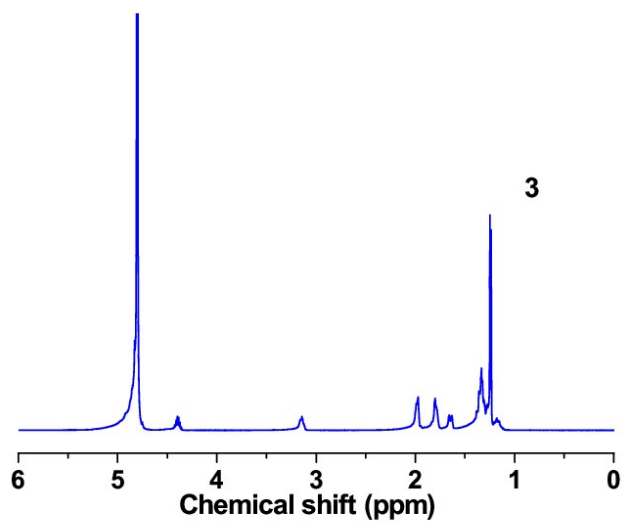

**Figure S4.**  $^1\text{H}$  NMR spectrum of compound **3** ( $\text{D}_2\text{O}$  500 MHz).

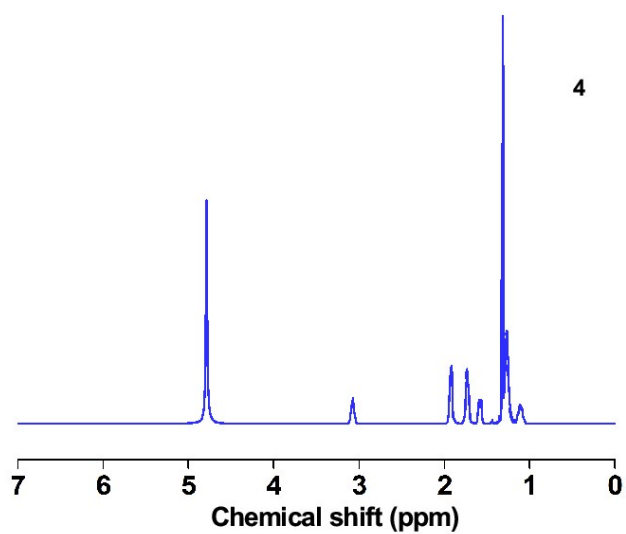

**Figure S5.**  $^1\text{H}$  NMR spectrum of compound **4** ( $\text{D}_2\text{O}$  500 MHz).

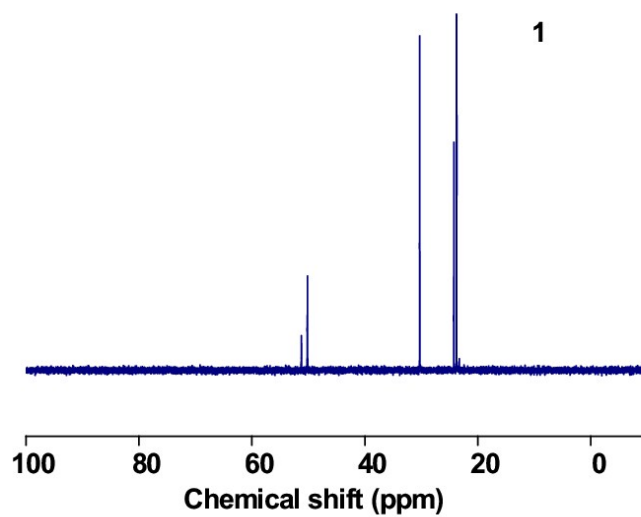

**Figure S6:**  $^{13}\text{C}$  NMR spectrum of compound **1** ( $\text{D}_2\text{O}$ )

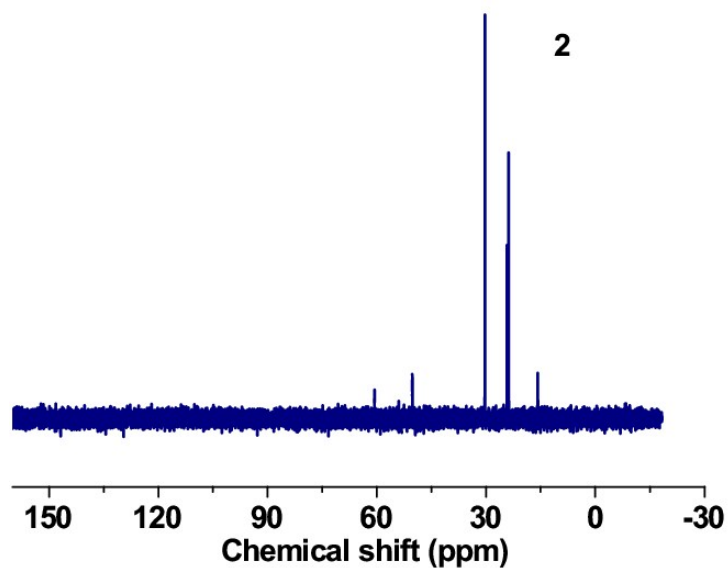

Figure S7:  $^{13}\text{C}$  NMR spectrum of compound **2** ( $\text{D}_2\text{O}$ )

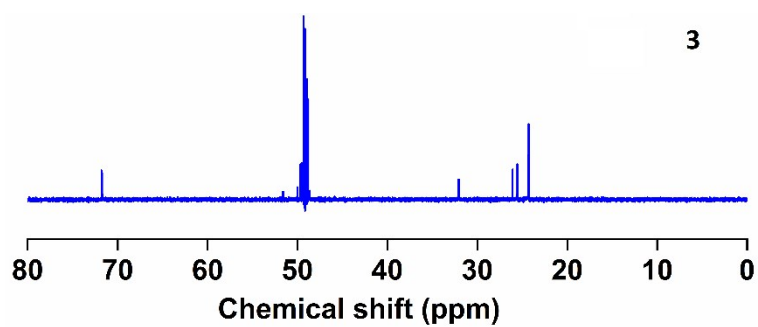

Figure S8:  $^{13}\text{C}$  NMR spectrum of compound **3** ( $\text{DMSO-d}_6$ )

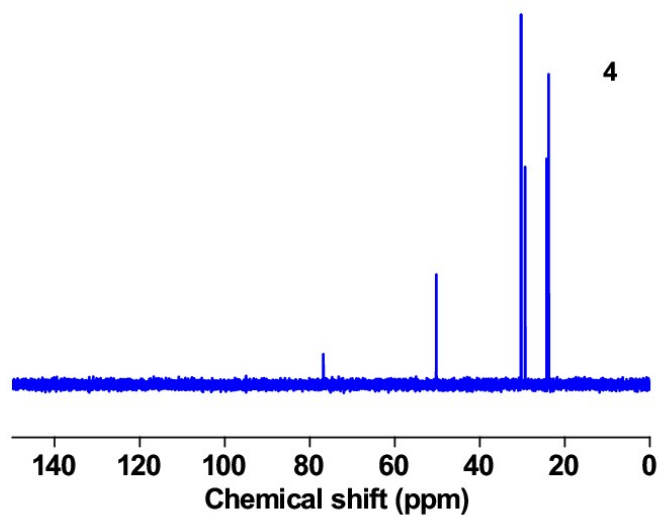

Figure S9:  $^{13}\text{C}$  NMR spectrum of compound **4** ( $\text{D}_2\text{O}$ )

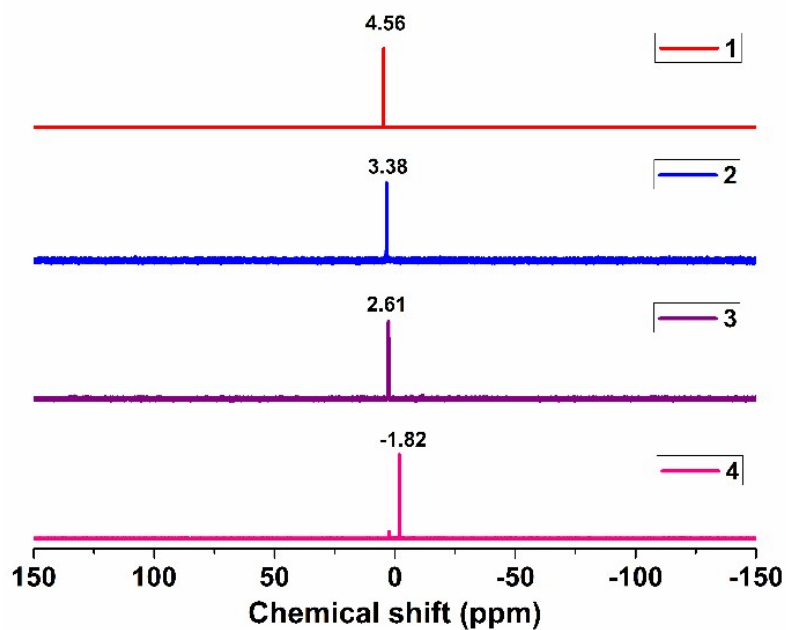

Figure S10:  $^{31}\text{P}$  NMR spectra of compounds **1-4** in ( $\text{D}_2\text{O}$ ).

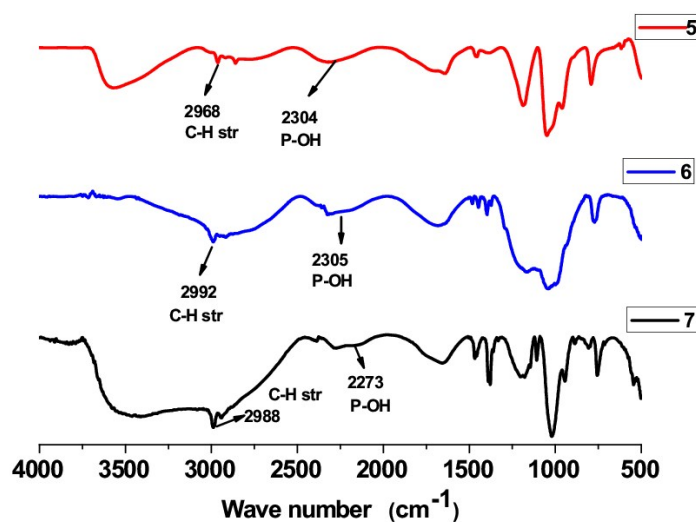

Figure S11. FT-IR spectra of compound **5-7**.

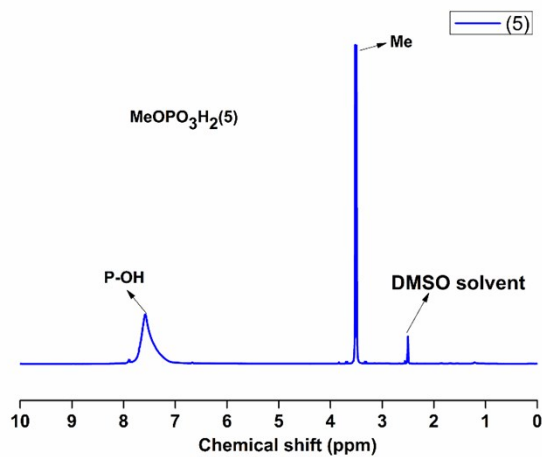

Figure S12.  $^1\text{H}$  NMR spectrum of compound **5** ( $\text{DMSO-d}_6$  500 MHz).

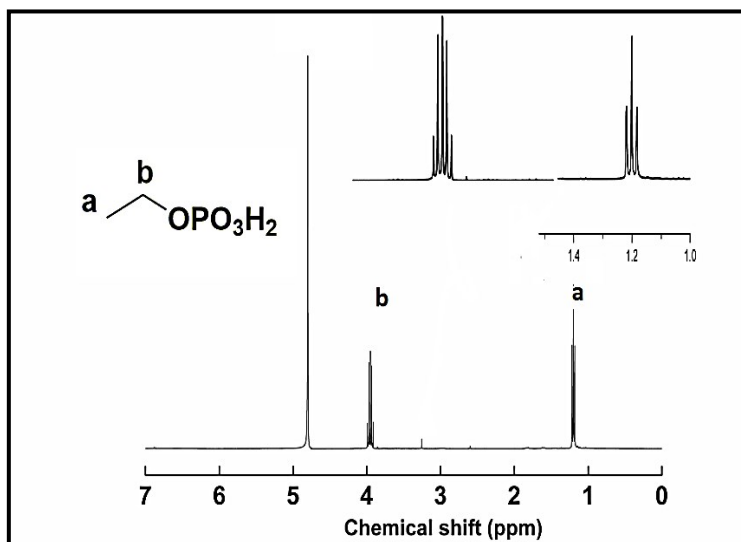

**Figure S13.**  $^1\text{H}$  NMR spectrum of compound **6** (D<sub>2</sub>O 500 MHz).

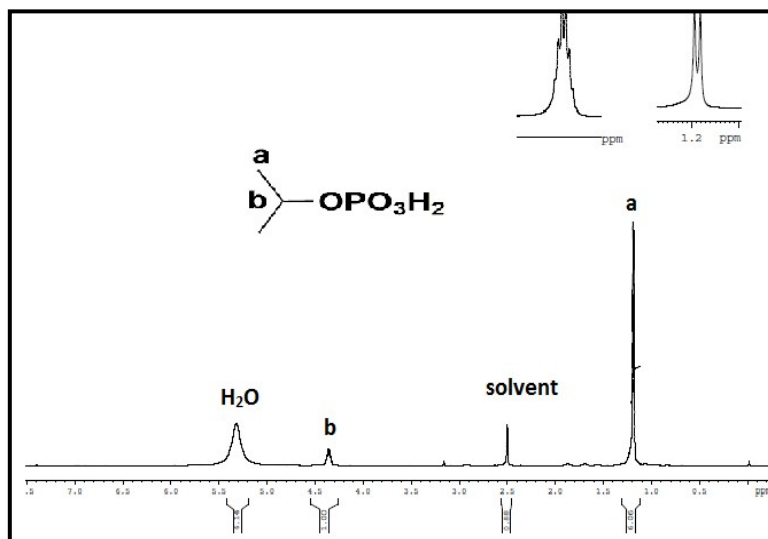

**Figure S14.**  $^1\text{H}$  NMR spectrum of compound **7** (DMSO-*d*<sub>6</sub> 500 MHz).

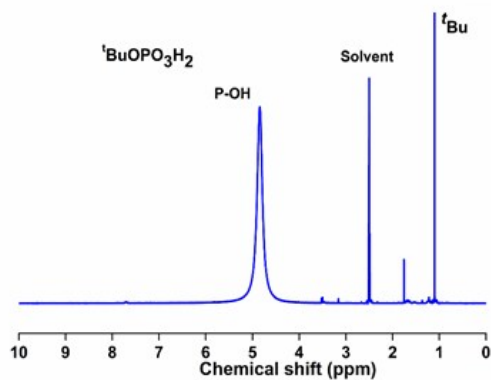

**Figure S15.**  $^1\text{H}$  NMR spectrum of compound **8** (DMSO-*d*<sub>6</sub> 500 MHz).

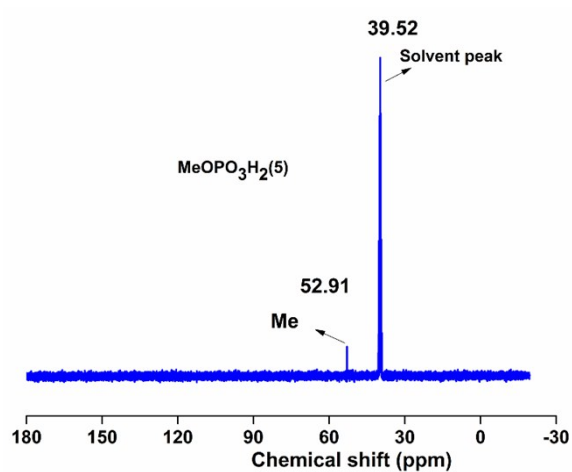

**Figure S16:**  $^{13}\text{C}$  NMR spectrum of compound **5** ( $\text{DMSO-d}_6$ )

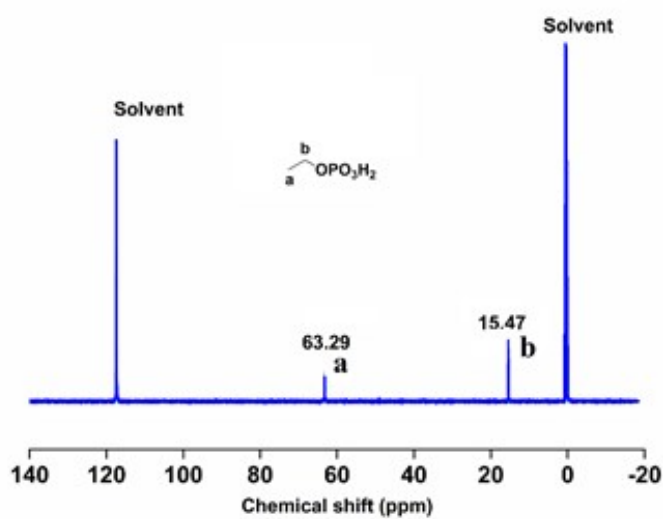

**Figure S17:**  $^{13}\text{C}$  NMR spectrum of compound **6** ( $\text{CD}_3\text{CN-d}_3$ )

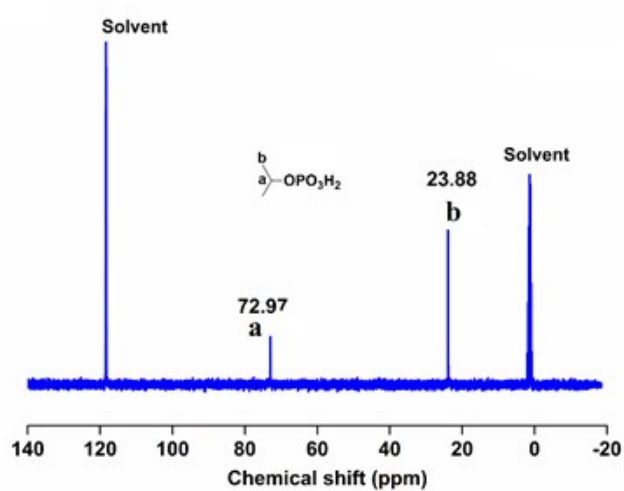

**Figure S18:**  $^{13}\text{C}$  NMR spectrum of compound **7** ( $\text{CD}_3\text{CN-d}_3$ )

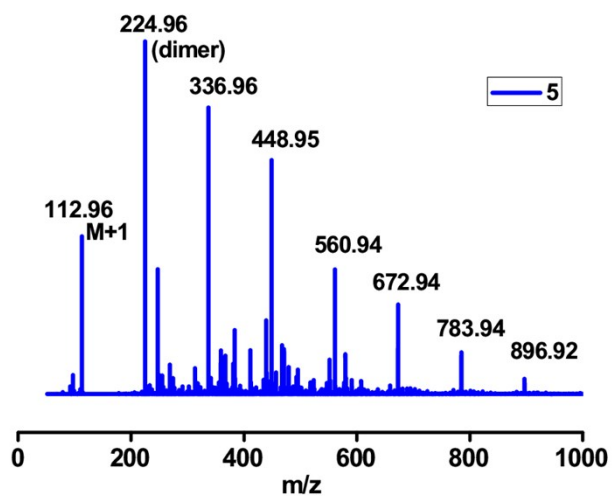

**Figure S19:** ESI-MS spectrum of compound **5** (reported in  $\text{CH}_3\text{CN}$ )

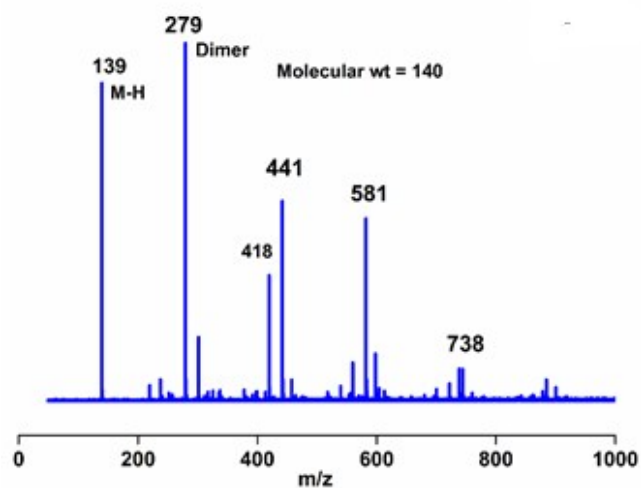

**Figure S20:** ESI-MS spectrum of compound **7** (reported in  $\text{CH}_3\text{CN}$ )

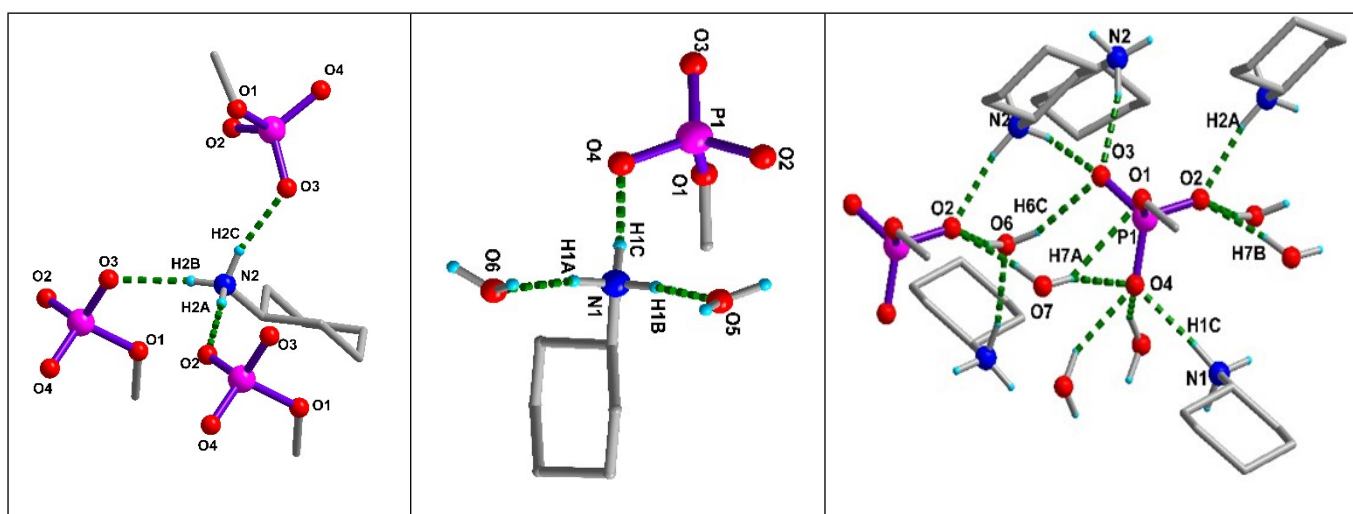

**Figure S21:** Molecular structure of **1** showing immediate hydrogen bonding interactions between hydrogen atoms of quaternised cyclohexyl amine and the oxygen and hydrogen atoms of methyl phosphate ligand.

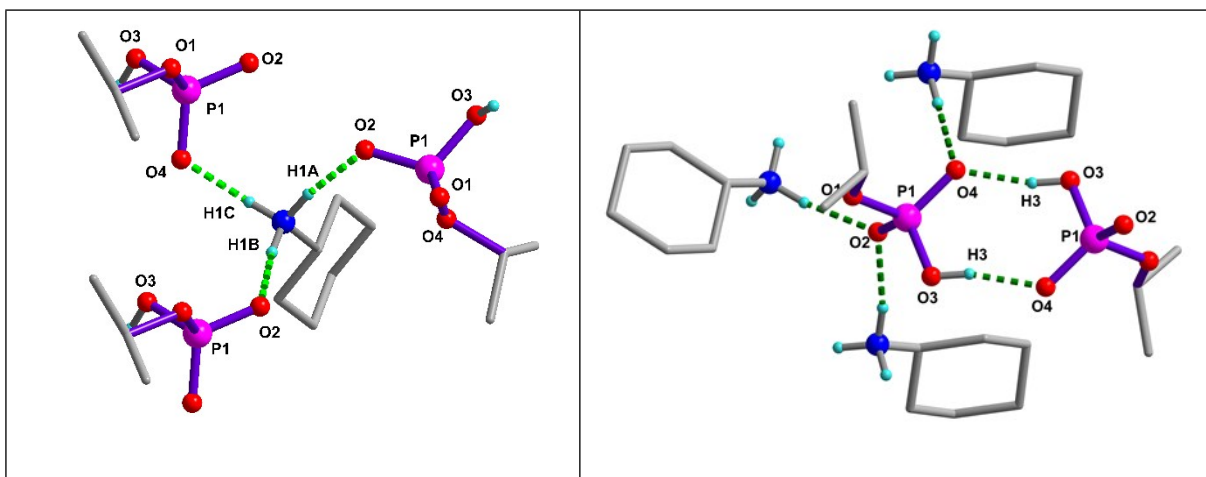

**Figure S22:** Molecular structure of **3** showing immediate hydrogen bonding interactions between hydrogen atoms of quaternised cyclohexyl amine and the oxygen and hydrogen atoms of isopropyl phosphate ligand.

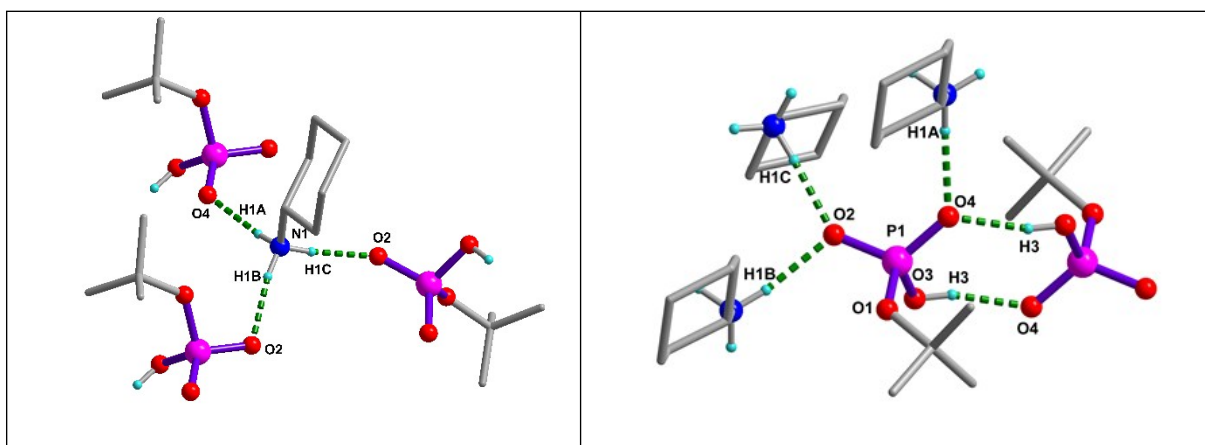

**Figure S23:** Molecular structure of **4** showing immediate hydrogen bonding between hydrogen atoms of quaternised cyclohexyl amine and the oxygen and hydrogen atoms of tertiary butyl phosphate ligand.

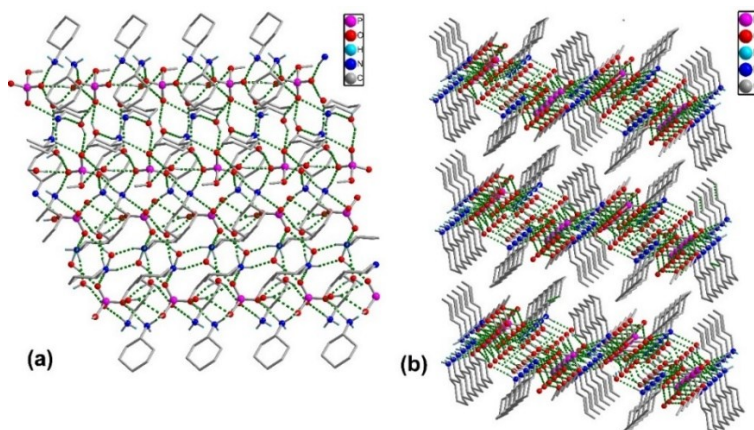

**Figure S24:** Hydrogen bonding interactions in **1** (a) represents the sheet formation due to extensive hydrogen bonding between the hydrogen atoms of cyclohexyl ammonium, lattice  $\text{H}_2\text{O}$  molecules and  $\text{OPO}_3\text{H}$  units of methyl phosphate; (b) represents the layered structure of **1**.

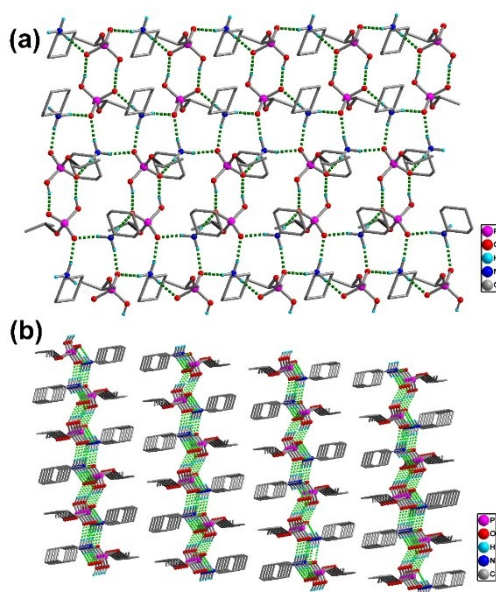

**Figure S25:** Hydrogen bonding interactions in **3** (a) represents the sheet formation due to extensive hydrogen bonding between the hydrogen atoms of cyclohexyl ammonium and  $-\text{OPO}_3\text{H}$  units of isopropyl phosphate; (b) represents the layered structure of **3**.

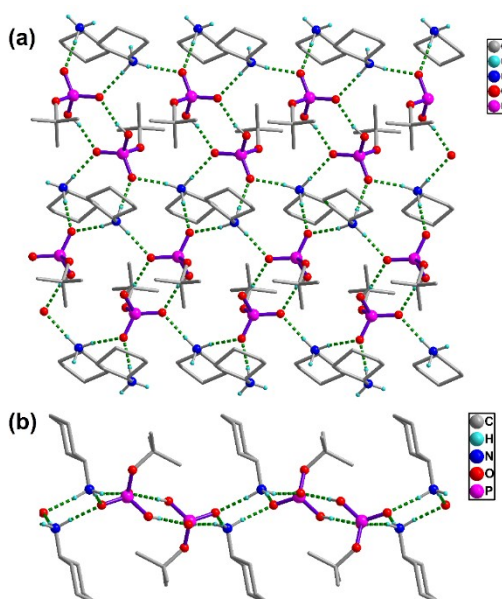

**Figure S26:** Hydrogen bonding interactions in **4** (a) represents the sheet formation due to extensive hydrogen bonding between the hydrogen atoms of cyclohexyl ammonium and  $-\text{OPO}_3\text{H}$  units of tertiary butyl phosphate; (b) represents one dimensional chain formation in **4**.

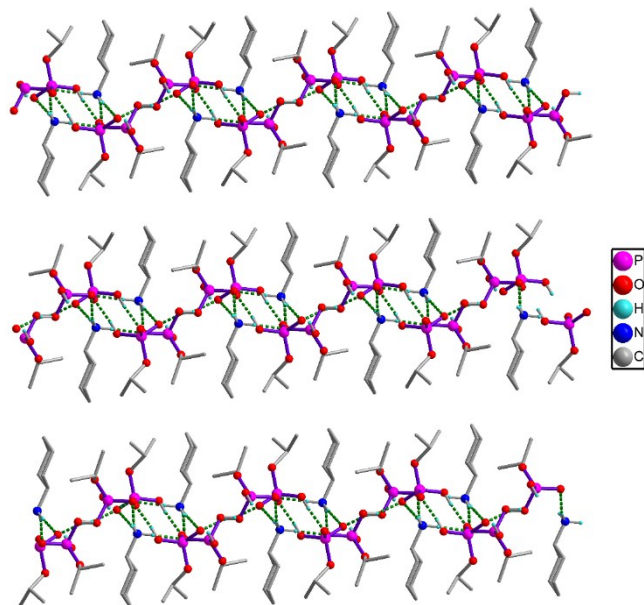

**Figure S27:** Hydrogen bonding interactions in **9**; represents the sheet formation due to extensive hydrogen bonding between the hydrogen atoms of cyclohexyl ammonium and  $\text{-OPO}_3\text{H}$  units of tertiary butyl phosphate and  $\text{OPO}_3\text{H}_2$  units of free isopropyl phosphate.

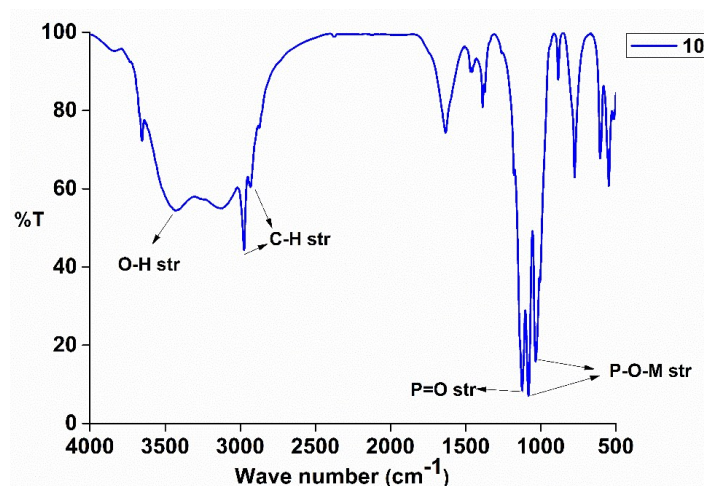

**Figure S28.** FT-IR spectrum of compound **10**

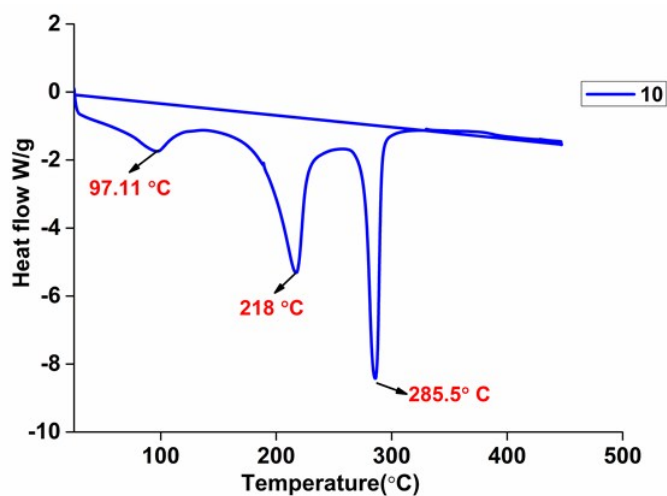

**Figure S29.** DSC trace of **10**

## Morphological characterisation of **10**

The SEM micrographs (Figure 14) viewed down two perpendicular directions underline the presence of large plates that are stacked over one another to form a lamellar structure (micrographs in Figure 14(a) - (d)). An EDX analysis of a section of this lamellar structure revealed uniform distribution of various elements with high homogeneity. While the formation of layered structures among metal phosphonates is very common,<sup>44</sup> metal mono organophosphates are often isolated as well-defined clusters.<sup>47-49</sup> Thus, compounds such as **10** can be exploited for the applications generally exhibited by layered phosphonates apart from them being also utilized for low-temperature synthesis of ceramic phosphates.

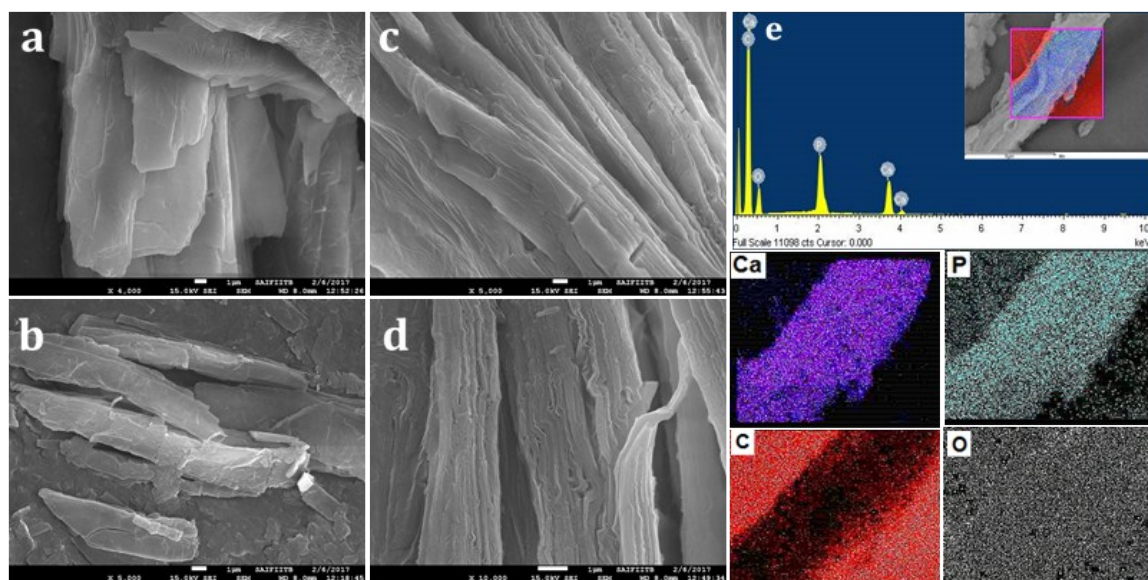

**Figure S30.** The SEM micrographs of **10** showing plate like crystals (at (a) 4000x and (b) 5000x magnification) that are stacked one over other to form lamellar structure (at (c) 5000x and (d) 10000x magnification); (e) EDX spectrum of **10** with elemental mapping.

**Table S1:** Hydrogen bond table for **1** [ $\text{\AA}$  and  $^\circ$ ].

| D-H...A             | d(D-H) | d(H...A) | d(D...A) | $\angle(\text{DHA})$ |
|---------------------|--------|----------|----------|----------------------|
| O(6)-H(6C)...O(3)#1 | 0.85   | 2.12     | 2.934(4) | 161.2                |
| O(6)-H(6D)...O(2)#2 | 0.85   | 2.01     | 2.850(4) | 167.9                |
| N(2)-H(2A)...O(2)   | 0.89   | 1.89     | 2.766(4) | 167.8                |
| N(2)-H(2B)...O(3)#3 | 0.89   | 2.01     | 2.884(4) | 167.6                |
| N(2)-H(2C)...O(3)#4 | 0.89   | 1.93     | 2.798(4) | 165.2                |
| N(1)-H(1A)...O(6)   | 0.89   | 1.94     | 2.814(4) | 166.6                |
| N(1)-H(1B)...O(5)#2 | 0.89   | 1.98     | 2.839(5) | 161.6                |
| N(1)-H(1C)...O(4)   | 0.89   | 1.96     | 2.850(4) | 175.7                |
| O(5)-H(5C)...O(4)   | 0.85   | 2.15     | 2.872(5) | 143.0                |
| O(5)-H(5D)...O(4)#1 | 0.85   | 2.06     | 2.835(5) | 150.4                |
| O(7)-H(7A)...O(4)#3 | 0.85   | 2.52     | 3.317(5) | 155.9                |
| O(7)-H(7A)...O(1)#3 | 0.85   | 2.46     | 3.173(5) | 141.5                |
| O(7)-H(7B)...O(2)   | 0.85   | 1.99     | 2.840(5) | 174.3                |
| C(8)-H(8A)...O(1)   | 0.97   | 2.64     | 3.603(5) | 170.5                |

Symmetry transformations used to generate equivalent atoms:

#1 -x+1,-y+2,-z+1 #2 -x+1,-y+1,-z+1 #3 x,y-1,z

#4 -x+1,y-1/2,-z+3/2

**Table S2:** Hydrogen bond table for **2** [ $\text{\AA}$  and  $^\circ$ ].

| D-H...A             | d(D-H) | d(H...A) | d(D...A) | $\angle(\text{DHA})$ |
|---------------------|--------|----------|----------|----------------------|
| N(1)-H(1A)...O(4)#1 | 0.91   | 1.91     | 2.822(2) | 177.0                |
| N(1)-H(1B)...O(2)#2 | 0.91   | 1.88     | 2.786(2) | 175.9                |
| N(1)-H(1C)...O(2)   | 0.91   | 1.83     | 2.741(2) | 173.9                |
| O(3)-H(3)...O(4)#3  | 0.84   | 1.75     | 2.577(2) | 168.0                |

Symmetry transformations used to generate equivalent atoms:

#1 x,y-1,z #2 -x+3/2,y-1/2,-z+3/2 #3 -x+3/2,-y+3/2,-z+1

**Table S3:** Hydrogen bond table for **3** [ $\text{\AA}$  and  $^\circ$ ].

| D-H...A             | d(D-H) | d(H...A) | d(D...A) | $\angle(\text{DHA})$ |
|---------------------|--------|----------|----------|----------------------|
| O(2)-H(2)...O(4)#1  | 0.84   | 1.72     | 2.544(6) | 166.6                |
| N(1)-H(1A)...O(3)   | 0.91   | 1.86     | 2.761(7) | 170.1                |
| N(1)-H(1B)...O(3)#2 | 0.91   | 1.82     | 2.720(7) | 168.5                |
| N(1)-H(1C)...O(4)#3 | 0.91   | 1.89     | 2.797(7) | 176.6                |

Symmetry transformations used to generate equivalent atoms:

#1 -x,-y+2,-z #2 -x+1/2,y-1/2,-z+1/2 #3 -x+1/2,y+1/2,-z+1/2

**Table S4:** Hydrogen bond table for **4** [ $\text{\AA}$  and  $^\circ$ ].

| D-H...A             | d(D-H) | d(H...A) | d(D...A) | $\angle(\text{DHA})$ |
|---------------------|--------|----------|----------|----------------------|
| C(2)-H(2A)...O(3)#1 | 0.96   | 2.62     | 3.551(5) | 163.1                |
| N(1)-H(1A)...O(4)#2 | 0.89   | 1.91     | 2.778(3) | 165.4                |
| N(1)-H(1B)...O(2)   | 0.89   | 1.94     | 2.822(3) | 171.5                |
| N(1)-H(1C)...O(2)#3 | 0.89   | 1.86     | 2.744(3) | 174.8                |

Symmetry transformations used to generate equivalent atoms:

#1 -x+3/2,-y+3/2,-z+1/2 #2 x,y+1,z #3 -x+1,y+1/2,-z+1/2

#4 -x+3/2,-y+1/2,-z+1/2

**Table S5:** Hydrogen bond table for **7** [ $\text{\AA}$  and  $^\circ$ ].

| D-H...A            | d(D-H)  | d(H...A) | d(D...A)   | $\angle(\text{DHA})$ |
|--------------------|---------|----------|------------|----------------------|
| O(4)-H(4)...O(2)#1 | 0.82(2) | 1.77(2)  | 2.5837(15) | 172(2)               |
| O(3)-H(3)...O(2)#1 | 0.82(2) | 1.77(2)  | 2.5854(14) | 176(2)               |

Symmetry transformations used to generate equivalent atoms:

#1 y,-x+1/2,-z+5/2 #2 y,-x+1/2,-z+3/2

**Table S6:** Hydrogen bond table for **9** [ $\text{\AA}$  and  $^\circ$ ].

| D-H...A             | d(D-H) | d(H...A) | d(D...A) | $\angle(\text{DHA})$ |
|---------------------|--------|----------|----------|----------------------|
| O(3)-H(3)...O(2)#1  | 0.84   | 1.75     | 2.591(3) | 174.1                |
| O(7)-H(7)...O(4)#2  | 0.84   | 1.75     | 2.531(3) | 154.5                |
| O(8)-H(8)...O(2)#3  | 0.84   | 1.95     | 2.532(3) | 125.8                |
| N(1)-H(1A)...O(4)#2 | 0.91   | 1.90     | 2.805(3) | 173.2                |
| N(1)-H(1B)...O(6)#2 | 0.91   | 1.99     | 2.868(3) | 161.5                |
| N(1)-H(1C)...O(6)#4 | 0.91   | 1.89     | 2.779(3) | 166.3                |

Symmetry transformations used to generate equivalent atoms:

#1 -x+1,-y,-z+1 #2 -x+1/2,y+1/2,-z+1/2 #3 x,y+1,z

#4 x-1/2,-y+3/2,z-1/2
